# Supplementary material for: Localization of potato browning resistance genes based on BSA-seq technology
Source: PeerJ. 2024 Aug 6;12:e17831. doi: 10.7717/peerj.17831 (PMC11313402; doi:10.7717/peerj.17831)
Supplement: Supplemental Information 2 [file peerj-12-17831-s002.xlsx]

## Sheet: Sheet1
275 Potato resources screening
Potato resources	Browning index				Browning strength	Steam-cooked browning
	0.5h	2h	5h	7h
-9	100	100	100	100	0.395536	7
194	0	16.6625	29.1625	37.5	0.324036	8
295	25	25	100	100	0.238363	8.5
04P48-3	0	25	50	75	0.153285	8
05HE5-43	0	37.5	50	62.5	0.247619	8
06H26	25	75	91.67	100	0.424286	7
08CA0979	50	87.5	100	100	0.329134	8
08CA9728-04	25	25	25	50	0.166992	8
08HE042-2	50	50	75	75	0.23301	7
2013Y45	25	66.67	100	100	0.447191	7
292-20	12.5	50	50	62.5	0.318095	6
83Y64	25	62.5	100	100	0.249573	8
Amsel	75	100	100	100	0.363208	8.5
Andover	12.5	37.5	45.83	66.67	0.200855	8
Anemone	29.17	100	100	100	0.382051	7
Aquila	25	100	100	100	0.430097	7
Astilla	25	87.5	100	100	0.35	8
Atlantic	0	12.5	37.5	62.5	0.133333	7
Atzimba	8.33	33.33	62.5	95.83	0.233333	8
Aula	12.5	37.5	54.17	87.5	0.340566	8
Ba 90-2-6	0	25	25	79.17	0.224	7
Bashu 7	25	62.5	70.83	87.5	0.383761	8
BE200158-3	37.5	100	100	100	0.373554	7
BE200170-10	12.5	12.5	12.5	12.5	0.122549	6.5
BE20079-24	50	75	100	100	0.294792	7.5
BE20413-22	12.5	37.5	75	79.17	0.320455	8
Bintje	0	37.5	66.67	62.5	0.471134	8
Bo-B2	75	100	100	100	0.38	7
Bo-BR	25	50	75	75	0.415842	7
Bo-C	12.5	50	75	100	0.317241	7
Bo-S	25	87.5	87.5	87.5	0.42381	7.5
Boyou 2	12.5	50	87.5	95.83	0.394118	8
Cal White	0	66.67	79.17	100	0.221311	8
Carola	0	25	70.83	91.67	0.258763	7
Chenggong	50	75	75	100	0.326389	5
Chuanyi	0	50	54.17	66.67	0.457692	8
Chunshu 1	25	75	100	100	0.297391	7
CIP388611.22	12.5	37.5	75	87.5	0.526126	7
CIP388615.22	0	25	58.33	75	0.303636	8
CIP388676.1	62.5	87.5	100	100	0.461682	7
CIP388972.22	41.67	95.83	100	100	0.236296	7.5
CIP390663.8	50	91.67	100	100	0.296491	7
CIP391002.6	0	12.5	41.67	54.17	0.152713	8
CIP391011.17	12.5	20.83	37.5	45.83	0.396491	8
CIP391180.6	4.17	20.83	100	100	0.385714	7
CIP392633.54	0	75	100	100	0.764	7.5
CIP392797.22	0	50	87.5	100	0.279048	8.5
CIP393077.159	12.5	58.33	87.5	100	0.287395	8
CIP393077.54	37.5	37.5	66.6667	75	0.24322	8.5
CIP393371.157	0	37.5	62.5	75	0.285714	8
CIP393615.6	0	0	0	0	0.15102	5
CIP393617.1	25	37.5	62.5	62.5	0.195413	7
CIP395037.107	0	25	58.33	100	0.242975	8
CIP395109.29	0	0	0	0	0.185366	7
CIP395112.9	0	25	87.5	87.5	0.303604	8.5
CIP395434.1	12.5	25	58.33	50	0.353398	7
CIP396004.263	0	12.5	37.5	51.17	0.443011	7
CIP396033.102	0	20.83	54.17	79.17	0.297143	8
CIP396311.1	37.5	41.67	54.17	79.17	0.630526	8.5
CIP397073.16	25	75	79.17	100	0.393966	7
CIP397077.16	12.5	45.83	83.33	100	0.316346	8
CIP397100.9	0	12.5	25	29.17	0.134167	8.5
CIP399004.19	0	25	25	50	0.404202	7
CIP703831	66.67	100	100	100	0.360331	7
Ckapб	25	87.5	100	100	0.196907	7
Colmo	0	12.5	62.5	75	0.250588	8
Dadi	25	100	100	100	0.3416	8
Delta	0	79.17	100	100	0.467677	7
Denali	0	12.5	25	54.17	0.191111	8
Dianella	0	25	25	45.83	0.268421	7.5
Diniela	0	54.17	75	87.5	0.441111	8
Dongnong 00-33048	0	25	62.5	83.33	0.402778	5
Dongnong 0733-125	8.33	58.33	100	100	0.375177	7
DY4-5-10	25	16.67	29.17	41.67	0.293548	7
E-13	50	75	75	100	0.210714	7
E-3	37.5	62.5	75	87.5	0.293458	6
E-421	0	12.5	37.5	54.17	0.227434	8
E-5	12.5	25	25	37.5	0.239326	8
Eramosa	8.33	45.83	91.67	100	0.254639	6.5
Eyin	25	100	100	100	0.247826	8
F00070	50	100	100	100	0.287255	8
F70021-1	25	33.33	87.5	100	0.167416	8
Favorita	0	12.5	50	75	0.25625	8.5
Feixing	25	75	100	100	0.321495	8
FL1533	16.67	37.5	91.67	100	0.41573	7
FL1625	25	91.67	100	100	0.497849	7
Fujian	25	95.83	100	100	0.429545	6
GADRE	25	75	79.17	100	0.351923	7
GaRant(mapaиm)	25	37.5	62.5	75	0.476636	7
Hu 5	12.5	50	75	87.5	0.244554	7
Hu 8212-3	0	29.17	75	100	0.245545	8
Hu 9707-116	0	50	100	100	0.204959	6.5
Hu H97-9	87.5	100	100	100	0.463063	7
Hu H99-1	75	87.5	100	100	0.48	7
Hu H99-9	100	100	100	100	0.523711	5
Hu83210	12.5	75	100	100	0.240952	8
Hu9058-2	37.5	100	100	100	0.341964	8
IH01-5	25	50	62.5	87.5	0.194118	8
IMRALA-1	0	8.33	41.67	100	0.163866	9
J10828	0	25	75	87.5	0.347872	8
Jin90-7-23	50	75	83.33	87.5	0.375	8
Jizhang	33.3375	70.8333	100	100	0.337838	8
Jizhang 11	79.1625	91.6625	100	100	0.339564	8
Jizhang 14	25	87.5	100	100	0.175258	8
Jizhang 8	12.5	37.5	75	91.6667	0.245902	8
Jizhang12	12.5	12.5	62.5	62.5	0.158871	7.5
K1	12.5	54.17	75	100	0.212621	7
K16-6	25	62.5	87.5	100	0.327451	7
K2	33.33	45.83	87.5	100	0.231731	8
K200001-24	0	29.17	62.5	87.5	0.177011	7
K200373-13	25	100	100	100	0.289535	7
K200632-12	33.3333	58.3333	100	100	0.208	8
K200809-90	8.33	8.33	12.5	16.67	0.33913	8
K200846-10	0	25	83.33	91.67	0.170093	8
K200852-13	50	100	100	100	0.180208	8
K200852-205	25	50	87.5	100	0.193548	8
K200852-24	0	33.33	100	100	0.208	7
K200856-6	25	100	100	100	0.349573	8
K200858-22	12.5	37.5	50	75	0.402439	7
K200867-15	37.5	87.5	100	100	0.327451	7
K200904-37	25	58.33	70.83	100	0.365	7
K200908-16	25	75	75	87.5	0.196522	8
K200920-11	50	100	100	100	0.303478	7
K200920-28	12.5	75	100	100	0.382796	7
K200920-35	75	100	100	100	0.491935	8
K200927-13	25	75	100	100	0.50989	7
K200931-1	25	70.83	100	100	0.20566	8
K200935-43	12.5	75	100	100	0.183486	6
K200935-51	25	100	100	100	0.498347	8.5
K200938-48	62.5	100	100	100	0.318519	8
K200950-3	0	0	16.67	33.33	0.154348	8.5
K200961-5	0	41.67	45.83	50	0.528829	7
K200968-12	62.5	100	100	100	0.222581	8
k200969-11	25	75	75	100	0.252941	8.5
K200969-2	0	33.33	75	87.5	0.303922	7
K200969-4	0	50	100	100	0.236054	9
K200979-17	75	100	100	100	0.314141	7
K200979-25	25	75	100	100	0.270455	6
K200979-3	45.83	70.83	95.83	100	0.362617	8
K3	50	66.67	66.67	66.67	0.377064	7
K4	66.67	100	100	100	0.168889	7
K9201-10	4.17	75	100	100	0.264394	8
K9412-13	25	50	79.17	75	0.245378	8
Kangheijingbing	0	37.5	66.67	70.83	0.602128	7
Kangyibai	25	50	87.5	87.5	0.268868	7
katadin	0	25	100	100	0.152427	6
Kende	25	75	100	100	0.26	8
Kennebec	25	95.83	100	100	0.172115	7
Kexin 1	70.83	75	100	100	0.440171	7.5
Kexin 2	16.67	41.67	91.67	100	0.191379	8
Kexin 4	62.5	100	100	100	0.407921	8
Kexin 6	25	70.83	100	100	0.416667	7
Kexin 12	12.5	62.5	75	100	0.361607	7
Kexin 13	0	12.5	12.5	29.17	0.329474
Kexin 14	12.5	37.5	79.17	91.67	0.313084	8
Kexin 17	25	33.33	54.17	100	0.445238	7
Kexin 18	37.5	100	100	100	0.393333	6
Kexin 19	75	100	100	100	0.378378	7
Kexin 20	58.33	91.67	100	100	0.489091	8
Kexin 21	75	100	100	100	0.241353	7
Kexin 22	20.83	37.5	62.5	62.5	0.172727	7
Kexin 23	12.5	12.5	50	91.67	0.476	8
Kexin 25	12.5	66.67	87.5	87.5	0.394495	8
Kexin 26	25	37.5	75	100	0.087395	8
Khongor	0	100	100	100	0.33301	8
Kunta	0	79.17	100	100	0.151579	8
KURODA	0	41.67	66.67	79.17	0.876667	7
Long201207-4	75	100	100	100	0.132258	7
Long201208-13	37.5	45.8375	66.6625	87.5	0.204208	8
Longshu 3	0	12.5	25	37.5	0.238318	7
Longshu 6	16.67	41.67	58.33	87.5	0.359055	8
Longshu 7	0	50	62.5	87.5	0.348544	8.5
Longxinxuan 1	50	75	100	100	0.679412	7
Lt-5	0	0	33.33	45.83	0.34902	7
Maiken 1	0	0	29.17	41.67	0.221649	8
Maiken 4	25	100	100	100	0.195283	7
Maiken 5	0	37.5	50	75	0.179091	7
Minshu 1	0	37.5	95.83	100	0.296875	8
Nanjue	25	75	100	100	0.226168	8
Ne 16	25	37.5	75	87.5	0.282524	7
Nehe gaodianfen	0	0	25	25	0.0889655	8
Norland	25	100	100	100	0.326119	7
NS51-5	12.5	25	62.5	83.33	0.304902	7
NS78-11	25	100	100	100	0.355446	7
Pepo416	0	0	0	0	0.146512	7
Pepo418	0	12.5	37.5	37.5	0.274038	7
Pepo426	0	25	25	25	0.307955	8
Qibaiwan	25	54.17	75	100	0.227059	8.5
Qingshu 9	0	70.83	100	100	0.229268	7
Quarta	12.5	62.5	79.17	91.67	0.178	8
s.goniocalyx	0	12.5	25	37.5	0.121348	8
S5-2-7-44-1-10-5-2-1-1-6-1-(11)	12.5	50	100	100	0.2	8
Saikai35	0	0	25	62.5	0.25814	8
Sante	0	25	100	100	0.27479	8
sebago	62.5	87.5	100	100	0.374783	7.5
SH11R-6	0	8.33	37.5	70.83	0.313333	8
Shancheng	25	54.17	91.67	100	0.183594	8
shepody	25	50	66.67	87.5	0.250893	8
Solist	0	4.17	75	79.17	0.265217	8
spunta	0	54.17	91.67	100	0.287903	7
Superior	25	100	100	100	0.220536	7
Taihe	25	75	100	100	0.239604	7
Vester	25	100	100	100	0.377885	8
Villas	0	25	25	45.83	0.111	7
Vitara	0	4.17	50	50	0.227723	8
Weishu 1	37.5	75	100	100	0.372449	7
WYJ1	0	12.5	37.5	62.5	0.165657	8
WYJ2	0	33.3333	87.5	100	0.0743243	9
WYJ3	25	37.5	75	100	0.262676	8.5
WYJ4	0	16.67	50	50	0.218103	8
WYJ5	12.5	37.5	62.5	75	0.133333	7
WYJ7	25	25	37.5	66.6625	0.201453	8
WYJ8	0	25	62.5	75	0.196599	8.5
WYJ9	62.5	91.6667	91.6667	91.6667	0.145714	8
WYJ11	0	25	33.3375	75	0.200918	8
WYJ12	8.3375	12.5	37.5	50	0.168683	8
WYJ13	0	12.5	33.3375	37.5	0.153623	8
WYJ14	25	25	87.5	91.6625	0.200658	8.5
WYJ15	0	25	25	25	0.198333	7.5
Xindaping	0	8.33	58.33	75	0.353175	8
Xingjia 2	0	0	37.5	45.83	0.321818	8
Xisen 3	25	100	100	100	0.146154	7
Xisen 4	8.33	83.33	100	100	0.220149	8
Yan 0225-432	0	25	100	100	0.426667	8
Yan 2005-1	0	8.33	12.5	12.5	0.361538	7
Yanshu 3	0	12.5	12.5	12.5	0.132	7
Yanshu 4	12.5	50	100	100	0.175524	8.5
Yiselie	25	45.83	87.5	87.5	0.297414	8
Youjin	12.5	45.83	100	100	0.201724	8
Yunshu 103	20.8375	20.8333	45.8333	50	0.127434	8
Yunshu 201	25	25	79.1625	79.1625	0.207477	8
Yunshu 202	0	12.5	25	37.5	0.344444	8
Yunshu 205	0	12.5	50	62.5	0.16875	7
Yunshu 303	50	50	62.5	62.5	0.224762	7
Yunshu 401	0	0	12.5	12.5	0.112069	8
Yunshu 501	0	0	0	0	0.117094	9
Yunshu 505	25	45.8375	75	75	0.159127	7
Yunshu827	25	87.5	87.5	87.5	0.224138	7.5
Zaodabai	62.5	100	100	100	0.218182	8
Zhengshu 5	12.5	66.67	100	100	0.371171	7
Zhong A9215-84	0	0	25	45.83	0.444554	7.5
Zhong C9305-6	0	25	70.83	75	0.185047	8
Zhongshu 1	4.17	25	62.5	100	0.23908	8
Zhongshu 4	0	37.5	100	100	0.203846	8
Zhongshu 5	0	0	37.5	100	0.197368	9
Zhongshu 6	12.5	41.67	41.67	62.5	0.433333	5
Zhongshu 12	0	25	95.83	100	0.270408	6
Zhongshu 17	12.5	37.5	87.5	100	0.223438	8
Zhukefu	0	41.67	83.33	100	0.221053	7
Архидея	75	87.5	100	100	0.436283	7
Атлант	0	25	58.33	70.83	0.318447	7
Вилъня	0	8.33	75	100	0.204348	8
вир244(Suniax-S.Stolonig)	0	37.5	95.83	100	0.201667	8
вишневый	45.83	100	100	100	0.310638	7
выток	75	100	100	100	0.489899	5
гибрид 59/m-56	8.33	12.5	29.17	62.5	0.2	7
гибрид 728-6	25	62.5	79.17	91.67	0.277273	5
гибрид 90.1/11	25	62.5	91.67	100	0.262931	6
гибрид МВ-168	0	0	8.33	8.33	0.183333	8
гибрид59/m-69	12.5	12.5	20.83	25	0.232941	5
гибрид80-1	0	0	12.5	16.67	0.268376	7.5
гибридMB-168	12.5	54.17	100	100	0.274227	7
Дельфин	37.5	100	100	100	0.320952	7
Журавинка	0	12.5	37.5	62.5	0.20241	8
зарево	0	20	75	87.5	0.143119	6.5
Здабыток	50	75	75	79.17	0.515517	8
Лилея	0	37.5	70.83	87.5	0.183036	8
Маг	0	25	87.5	100	0.457609	6.5
Максимум	0	0	0	12.5	0.0791667	6
Московский	33.33	62.5	75	75	0.360396	7
никунский	0	0	0	4.17	0.13956	7
орбита	45.83	87.5	100	100	0.222581	7
Ранный	8.33	20.83	70.83	87.5	0.317117	8
Тарант	12.5	100	100	100	0.562037	8
Уладар	50	75	75	87.5	0.303093	8
