# Supplementary material for: Localization of potato browning resistance genes based on BSA-seq technology
Source: PeerJ. 2024 Aug 6;12:e17831. doi: 10.7717/peerj.17831 (PMC11313402; doi:10.7717/peerj.17831)
Supplement: Supplemental Information 7 [file peerj-12-17831-s007.xlsx]

## Sheet: Sheet1
>Soltu.DM.08G009080.1
ATGTCCGCAACAGGGAGTTGCAGTTTGCCGGAATCGGAGTCCCACCGGCATCTCGTCAAG
GAGGTGAGAAGTCACGAGGTTGCGATAGCCGAACTCAGTAACCTTCCTGATTCTAGGGCT
GTCTACCGGAGAAATGGCAATCTATTCTTCCGTACAACTGTTCAGAAAGCAACAACATCA
GAACAAAGTAAAATATTCTATCTGTGCATGGATTCAAGCAGTTTTTGTACTGATCACTTT
TTCTGTATGTTGTTTTCATCTTCATTGTTTTTCTCTTTTGGGCAGAACAAGTGGACATGG
>Soltu.DM.08G009080.2
ATGTCCGCAACAGGGAGTTGCAGTTTGCCGGAATCGGAGTCCCACCGGCATCTCGTCAAG
GAGGTGAGAAGTCACGAGGTTGCGATAGCCGAACTCAGTAACCTTCCTGATTCTAGGGCT
GTCTACCGGAGAAATGGCAATCTATTCTTCCGTACAACTGTTCAGAAAGCAACAACATCA
GAACAAAAACAAGTGGACATGGTCAAATCTAAGTTACAAAAATTAAGCTCTTAA
>Soltu.DM.08G009100.1
ATGGCAGCTATGAAACTTGAAATTGAACGCTTTCGCCTGAACCTCTCTGCTGCTGAAAGG
GATAGGGCATTGTTGTCAATTGGTGTTGACCCTGCTAGTATAAATCCAAATCTACTACTT
GACAATTCTCGTATGGGAGGATTCTGCAGGGTAGCAAATGTCCTTGCTTTGCTTGGACAG
GCTTCTCTTGAGGATAAAATTACTGCTTCCGTTGGTCTTGAGATTGCCGATGATAGCGCT
GTAGATTTCTGGAATATAGCAGGAATCGGAGAAAGATGTATTGGTGGGGCATGTCAAGTT
CATTATGAAGATGGACCTGTATTGAATGTGCCTTCTGTATCATCAACTTCAGCTGCTGCA
CAGACCTCTTTTGTGTGTTCTGAATGTGAGAGAAAGGTTTGTAAAGTTTGTTGTGCAGGG
AAAGGAGCTCTTTTACTTGCTATGTTTAACTCAAAGGAGGTTCCCAGCTACAATGGTGTG
AGCAGCCAGGGGGGAGCAATCTATGTAAACTCAGTTGATTTATCCTCAAATCATTCCATG
ACACTTGATGGTGTCATTTGCAAAGCCTGCTGCATTGATGTTGTGCTTGAGGCTTTAACC
TTGGACAACATCAGGGTTTTGGTTGGCCAGAGGAGAAAAGCATGTGCAGATAGTGCTGCT
CAAAAAGCTGTAGACCATGTGATCAAATTTACTTCGGGGGATTGTCAATCCACACCAACT
GCATATCCGGAATTGTTTAATGGAGAGGAATCACTTGCTGAATTTCCTTTTGCAAGCTTT
TTGCACCCGGTTGAAACTGCAGCAGGATCTGCACCATTCATGTCGTTGCTTGCTCCATTG
AATTCTGGAGCACAAGATTCATTTTGGAGAGCTCCCCCCAGTGCTTCCTCTGTTGAATTT
GTCATTGTCCTTGGTGATTTATCTGATGTTTGTGGTGTTGTTCTTCTAGTTAGTCCTTGT
GGCTACTCGATGGCAGACACTCCTGTTGTTCAGATTTGGGCTAGCAGTAAAATACACAAG
GAAGAAAGATCATGTGTGGGGAAATGGGATATGAGATCTATGATCACCTCTTCCTCTGAG
CTTTGTGGACAAGAGAAGTCTTCTGAAGTGCCTAGACATGTAAAATTTTCTTTCCGTAAT
CCTGTTCGATGCCGCATTATTTGGATAACGTTGCGTCTACAAAAAGTTGGCTCGAGCTCT
GTAGATTTCGAGAAAGACTTTAGTCATTTGTCCGTAGAGGAGAACCCATTCGCAGAGCCT
GTAAGGCGTGCTTCATTTGGAGGACCAGTTGAAAGTGACCCATGTCTTCATGCTAAAAGA
ATCTTGGTGGTTGGAAGCCCATTGAGGAAAGATGTAGGGGCACCAAGTCAAGGCTCTGAC
CAGATTAATACAAGCAATTTGTTGGATAAAGGTCCTCCACTAAACAGATTTAAGGTTCCA
ATTGAGGTTGAGAGGTTAACTGACAGCGACCTTGTTTTAGAACAGTTTCTACCCCCAGTT
TCACCTATGCTGGCAGGTTTTCGTCTCGATGGTTTTAGTGCGATAAAACCTCGAGTCACC
CATTCACCACCTTCACAGGTGAATCCATGGGATGTTTCTTCTTGTATATTGGAGGACAGA
TTCATAAGTCCAGCTGTATTGTATATTCAAGTATCTGCTTTCCAGGAACCACACAATATG
GTCACCATTGCAGAATACAGGCTGCCAGAAGTGAAGGCGGGGACAGCAATGTACTTTGAT
TTTCCTAGACAAGATGACTCGGATGCTAGGGTCCGGATTGTGGCAGCAGGACTGTCTTTG
GCTAATAGAATCAAGTTGTATTATTATGCGGATCCCTACGAGCTCGGAAAATGGGCGAGT
CTTTCAGCTGTTTGA
>Soltu.DM.08G009110.1
ATGGATTCACCTGCTGGACGTCTGCGGGATACATCTGTTGTTGTTGTTACTCTGGAATCT
AGTGAAGTATACATTATTGTTAGTTTGTCTTCAAGGACGGATACACAGGTGATCTATGTT
GATCCCACAACTGGGAGTCTTCGCTATAATGCAAAGACAGGATATGATATTTTCAATTCT
CAAAATGAAGCCTTAGATTATGTGACAAATGGTTCAAAATGGCTGTGCAAGAGTATAATC
TATGCCAGAGCTGTGCTAGGCTATGCTTCTCTTGGGAGCTATGGTTTACTTCTTGTTGCG
ACAAAGTTGTCGGTCAGCATTCCAAATTTGCCTGGGGGTGGATGTATATATACTGTAACA
GAGACCCAATGGATCAAGATTTCACTTCAAAACCCTCAGCCACTGGGCAAAGGTGAAACT
AAGAATGTTCAAGAAGTGATGGAGCTTGATATTGATGGCAAGCATTATTTTTGTGAATCA
CGGGATATTACTAGACCTTTTCCAAGTCGTATGCCCTTGCTGAATCCTGATGATGAATTT
GTGTGGAATAAATGGTTTTCAATGCCCTTCAATAAGATAGGACTTCCAGAGCATTGTGTT
GTTCTTCTGCAGGGCTTTGCAGAATCCCGAAGTTTTGGAAGCTTAGGTCAGCAAGAAGGG
GTTGTTGCCCTCACTGCTCGACGTAGTAGGCTCCATCCTGGGACTCGGTATCTAGCAAGA
GGCTTGAATTCTTGCTATAGTACAGGCAATGAAGTTGAATGTGAGCAACTTGTATGGGTT
CCGAAAAGGGCTGTTCAAAGTGTTCCTTTCAATACTTACATCTGGAGAAGAGGCACTATT
CCTATGTGGTGGGGTGCGGAGTTGAAGTTGACTGCTGCAGAAGCAGAAATCTATGTCGCC
AATCGTGATCCTTATAAAGGAAGTGCTCAATACTATCAAAGGTTAACTAAGAGATATGAT
GCACGAAACCTAGATATAGCTGCTAGTGGGAACCAGCGAAAGAGTGCTTTTGTTCCAATT
ATATGTGTCAACTTGCTTAGGAATGGTGAAGGCAAATCAGAATCGATTTTGGTTCAGCAT
TTTGAGGAATCTTTGAATTATGTTAAATCAATTGGAAAACTACCTCATACTCGGGTTCAT
TTAATAAACTATGATTGGCATGCCAGTGTGAAGTTGAAAGGAGAACAACAAACAATTGAA
GGACTTTGGTACCTTCTAAAAGCACCCACAGTTGCTATTAGCATCACTGAAGGGGATTAT
CTGCCTTCTCTTCAGCGCATCAAAGATTGCAAAGGTGAAGTAATTTATAGTGATGACATT
GATGGAGCATTCTGCTTAAGATCGCATCAAAATGGAGTGATACGTTTCAATTGCGCTGAT
TCCTTAGATAGGACCAATGCTGCTAGTTTCTTTGGTGCCCTCCAGGTTTTTATGGAGCAG
TGCAGACGGTTAGGTATATCACTTGACAGTGATTTGGCATATGGTTATCAGTCATATAAC
AACAATGGGGGATACACAGCTCCATTACCTCCTGGCTGGGAGAAACGGTCTGACGCTGTA
ACTGGGAAAACATATTTTATTGATCACAATACAAGGACAACTACTTGGAATCATCCCTGT
CCAGATAAACCCTGGAAGAGATTTGATATGACATTCGATGAGTTCAAGAGATCGACAATC
TTATCACCTGTCTCTCAATTAGCAGATTTATTTTTGCTTGCTGGTGACATCCATGCAACA
TTGTATACTGGCTCCAAAGCTATGCACAGCCAAATTCTTAGCATATTTAATGAAGAAGCA
GGCAAATTTAAACAGTTTTCTGCTGCACAGAATATGAAAATTACTCTTCAGAGAAGATAT
AAGAATGCTGTTGTAGATAGTTCTCGTCAGAAGCAACTAGAGATTTTTCTTGGATTAAGG
CTTTTCAAGCATTTTCCATCAATTCCAACCCAGCCATTATATGTCGCTTCCCGTCCTACT
GGATGCTTTCTAAAGCCAATTGTGAATATGTTCCCGATTTCCGATGGTGGAGCAAATCTT
CTTAGTTTTAAAAGAAAAACAATGACATGGGTTACTCCACAGGCCACTGATGTAGTTGAA
CTTTTTATTTACCTCGGCGAGCCTTGTCATGTTTGTCAGCTACTTCTCACTGTTGCACAT
GGTTCTGATGATTCAACGTTCCCATCAACAGTTGATGTCAGGACAGGGCGTTATCTGGAT
GGACTTAAGCTTGTTCTGGAGGGAGCTTCTATTCCTCAGTGTGCAAATGGGACAAATATT
TTAATTCCATTGTCAGGACCAATTAGTGCAGAGGACATGGCTATCACTGGTGCAGGTGCA
CGGCTTCATGCCCAAGATGCATCCACGCTTCCATTAATGTATGATTTTGAGGAACTTGAA
GGAGAAGTGGATTTTCTTACTCGTGTTGTTGCACTCACGTTTTATCCGGCTGCAGATGGT
GGAGGCCCTATAACTCTCGGTGAGATTGAGATTCTTGGAGTATGTCTTCCATGGAGGTTC
ATATTGAAACATGAAGGCTCTGGCACTGGATTTTCTAAACAAGCAGAAGCCCATCATGAT
GTTACTAACCCTTTTCTGACCGAGCCCGGGGAAAATCCTTTTGCTTCTTCTTTAACCACT
GGTACACAAGCAAACTCGTCTGTTGACTCATGGGTAGACCTTTTAACAGGCGAAAGCAGA
ATTTCAGATTCTAATAGGCAGCCAGTGGCTGAAACTGTCTTCCATGGCGGAGATGACCTG
CTTGACTTCTTGGATGATGCTTTTGTCCAACAACCAAAGGAAGCTAACGTTTTTTCCAAC
AGCACGTCTAAAGGGCCTACTAACAATAACACTCAACGCTATTTGGATTGTTTCAAACTC
CTTGTGGGACCCCAAATGGTACGTGTCTTTTGGATTTTTATATTACTTTTATGCTTCTGA
>Soltu.DM.08G009160.1
ATGTGTCATACTGCAGCGCATCAAAAATCTGAACCTGAAGATATTCCAGACCACTTATAC
ATTGTAGAATCACTAGGATCATTATTTCTAACTTTTCGATATGGTGTTCAACTTAGGTTA
GTCCAATATGATTGTTGCGACAGGTTTCCATTAATGCTCATCCCAGAAGATGATGATGAG
GTGGGGCTGGAGATAGCATACAAGACAAAGAAATTTTCAATTTTTCCAGGTCGATTTAGC
TGCTGGCAGAATGACAGAAACCACGGAATTAGGGGACAATGCTTTTTTCTAGGTTCTAAT
GCTTCTCTTTTAGACCAAGCTTCTCAATTTCCAGGAATCAAGCCCAATCATATTTATTTC
ACATGCAATTTTCTTGAAACATACATATCCTATGAAGAAGGAGGAGACTTGGACCCCATG
GGGGTGTTAAACTTAGCAGATGACAGCATCCTGCCGCATTACAATGGTGTTTTCCTCAGT
TGTTTTTGTCCCTCGAACTTAGTGGCACCTAATGTAAATCAAAAACTAAGGGGATGCAAA
AGAGCTCCTCTTGCAGATGGATAA
>Soltu.DM.08G009180.1
ATGAATCCTCAGACCTTCATTAGGCTCTCAATAGGGTCACTGGGGTTGAGAGTGCCTGGA
ATAACATTAAATGGTGCAAAATCAGGGAGAAGTGCATTATCTTTTCCTTGTGTGTGCGAG
ATCCGTCTTCGTGGTTTCCCTGTGCAAACAGCAATAATTCCATTGGTATCTTCTCCTGAA
ACTACTCCAGATTCTAACAATATCGCCTCCAGTTTTTATCTTCAAGAATCTGATTTGAAA
GCATTACTGGCACCTGGCTGTTTATTAAAGCATCATGCATGTCTAGAGATAGTTGTTTTC
ACAGGACACAATGAAAGTCACTGCGGTATTAGTATTAAAAGGCAGCATATTGGGACGTTT
AAGCTGGAAGTAGGTCCTGAGTGGGGTAATGGAAGGCCAGTCATTCTGTTCAATGGTTGG
ATACACATTGGCAAGAACAAGTGGCTGGATGGAATAGCTGGAGCAGAGCTTCATTTGAGA
GTGAAGCTAGATCCAGATCCAAGATATATTTTCCAGTTTAAAGATAAGACCAAACTAAGT
CCACAAATAATTCAGCTTCAAGGAACCATCAAGCAGCCTATTTTTAGTTGCAAATTTAGC
CAAGACCGGGTATCTCCACGAGACCCATTGAGTAATTTTTGGTCTAGCTCTTTTGATGGT
TCTGAACTAGACATTGGAAAAAGAGAGAGGAAAGGATGGAATGTGAAGATACATGATCTC
TCTGGCTCGGCTGTTGCAGCAGCCTTCATAACAACTCCTTTTGTGCCGTCAACAGGTTGT
GATTGGGTTGCCAGATCCAACCCAGGAGCTTGGTTGATTGTTCGTTCTGATGTTTGCAGG
CCTGAAAGCTGGCATCCATGGGGAAAGCTTGAAGCATGGCGTGAACGTGGGATCAGAGAC
TCCATTTGCTGTCGGTTTCATCTACTAACAGAGGGTCACGAATTGGGGGATCTTCTTATG
TCTGAGATCTTGATCAGCGCTGAAAAGGGTGGGGAGTTCTACATAGACACGGACAAACAG
GTTAGAGCAGCATCGACTCCAATGCATAGTCCAAGAGGGAGTGGAGACTTTGCGGCAGTA
AGTCTTGCAGCAGAGGGTTTTGTGATGAGCTGTCGGGTGCAAGGGGAAGGGAAATGCAGC
AAGCCCCTTGTGCAGCTTGCGATGCGACATGTGACTTGTGTGGAGGATGTTGGGATTTTC
ATGGCTCTTGCAGCTGCAGTTGATCTGAGCATTGAAGCATGCAGGCCCTTCCGTAGAAGG
CTTAGAAGAAGTGCTAGCCATTCCTGGTGA
>Soltu.DM.08G009190.1
ATGGCTTTCTTCAATACCATCGCTTTTACATTCTTCTGCTTTCTACTTTCTTGCCCTTCT
TCTACTCAAACGCCATCTCCACCACCAGCTTCCTCTGCCCATGCTGCTGCAGTCGCACTC
CGCAACCGTGGCTACTCCCTCTTTGCTTCCACCATCGACTCCACAAACAATAATTTCTCC
GGCACTATTTTCGCCCCACCGGACTTCATTTTCTCTGCCAACATTCGCCCATCTCCACCA
CGCCCTTCCTCTCTTCTCCTTCGTTACCACACTCTCAAAACCCCTCTCACTTGGGTCAAA
CTTTTCTCCAATGACGTCAATGGCGTTCAGACTCTGTACAATAACAACTGTCTCTTCTTC
TTCAAGAGCTCTACCGGACAGCTATCCATTTCTTCCACACAGAATTCAATTGGGTTTGTT
AAAATCAGGCAACCTGACATTTACGTCGACAATCATCTCACCGTTCATGGAATCGATGGT
GTATTGGACCCCACCTCAGCAAGGAAATGCTCTGTTCAAACATCTGTTATCATTCAGTCT
GAACGCCACCGTCGATCTCTTCTTGATCACGCAATCAGAGCATTAAGGAGAAGACGATTC
ACTGTTGCCGCTACTGCGTTAACCATCAAGCGGCCGGAGCTGTTAACGTTGGCTTCCGTT
TCCCTTTTTGCCCCTTCTGATGTGGTTTTGTTCTCACAACCTCAAGGTTTCCATTACGAT
TACCGTCACCATGTTGTTCCCCAACGCTACCGTTTTGGGGATCTTGCTTCAACTACCCTT
ATGGTTTTCCAGACTCTTGCTCCGAACAAGACGCTGGTCGTAAATTTCAATGACGGCGTT
CTAACTGTTAACGGCGTTATTGTTAACAGTACCGAAGTTTATAGAAATCGGTGGATTGTT
GTGTTATCTGTGTCAATGTCGTTAGATGACACCGGTTATTTGCTTGATTCCGGCAGCTTT
GTGCCTTCTCCATCTCCGGCGACAATGGATATCCGTTTTCCGGATGAAAGAATTAACGGC
AGTGTCAAGTCTCCGTCTCCAGCGACAATGGAGATCCGCTATCCGGATGAGATAATTAAC
CCCAGTGTTGAGTCTCCTTCGCCGGAGACAATGGGGTTCGATTATCCTGATGAGATAAAT
ATCCCCAGTGTTGAGTCTCCTTCGTCGGAGACAATGGGGTTCGGTTATCCCGATGAGATA
CATAACGCCGGTGTTCCGGCCTCTATGGACATGTATTATCCTGAGGAGAGAATTGATGCT
TCTGTCGGTAGATCTCAATCTCCATTGGGGGCAACAATGGATGAGAGAATTAAGGATTTT
AGCACCAGTGTTGAGTCTCCATCGCCGGCGACAATGAAGGATTCATGGTGCGTGTTTGGA
TTGGAAGGCGGCGATCTACTTTGTCAGGCGAGTAGTCCCAGCCCCAGGAAGGAGGATGTG
ATTGAGGAAAGCGTGGCTGAATATGTACCGTCAGATGTAAAGGATGAATCTGTGCCGTTC
ATCTCAGAAGAAGATATTAGGATAGGTCATAATCATGAAGATCATTTAAATATTGCTAAT
GATCTCTTCTTTTACTTGTAG
>Soltu.DM.08G009200.1
ATGGCTAAGAGTGAGGGGGAACACTCGAATACGATGTCCGATGACGACATTCCCCTTACT
CACTTCGTTCCTAAACGAGTGCGATCTCAACTTCTCAAAGGGTCTGGAAAACCAGTGGGT
ATTCTCATGGATGATCCTGACGATGATAGTCAATCTACTCCGTCTGTTGTTGTTCCTGTG
AAGGTCACTGGGTCTGTAAAGAGGTCTTTGGAAGAGGGATTTGTTCTAATGAATTCTAAG
AAGCCACATTGCTTTGTCGGTAAGTCTTCTTGCAATGTTACGCCCATTGATAGTCTTGAT
GATTCGTCTGAGTTTGAGAGACCTAGTCGAAATAGAAAGCACCCATCCTCAAAATCTCTT
AAGAAACAAGTCAAAAAGGGTAAGAAAAAAACGTTGGGTAAAATCACCAAGAAAAATGGA
AAAGGACATAGGTAA
>Soltu.DM.08G009210.1
ATGTCTGTTGGAAGTGAAGGAGACAAAACACTGGAGGCAATCTGTTATAGGCGCGGCTCA
CTTCAGTTACTTGATCAAAGAAAACTTCCCTTAGAGACTCTTTATTTGGATATCCACGAT
ACAAACGATGCCTGGGATGCAATCAAGGAAATGGTTGTCCGTGGGGCACCTGCAATTGCT
ATAGCTGCTGCACTGTCTTTGGCAGTAGAAATTTCAAACCTAGCTTCCTTTGATGGGACT
TCTCATGATGCATCAGTTTTCCTAAGTAAAAAATTGGATTTTCTTGTTTCAAGTCGTCCA
ACAGCTGTTAATCTTTCAGATGCTGCAGTAAAGCTTAAAGAAGTTATAAGCAAGGCTGCT
GCCACAGCCAAAGAAACCAATTCAGTGTTTCAGGCTTACATTGAAGCTGCTGAAGTTATG
CTGGAGGATGATGTTACTTCCAATAAGGCAATTGGTTCATATGGAGCTAGTTTTATTAAG
AATTACTTGACAGACTCTAAGAATATAACAATTTTGACCCATTGCAACACTGGAAGTCTT
GCCACAGCTGGATATGGAACTGCTCTTGGTGTTATCCGGGCACTTTATGCTGACGGAGCT
TTAGAAAGGGCATACTGCACAGAAACACGTCCATTCAATCAGGGATCCAGATTGACTGCA
TTTGAATTGGTTCATGAAAACATCCCAGCCACCCTTATAGCTGATTCAGCTGCAGCTGCA
TTAATGAATGCTGGTCGTGTGAAAGCTGTCATTGTTGGAGCTGATCGTGTAGCTGCAAAT
GGTGATACTGCCAATAAGATCGGAACTTACAACCTTGCTGTTTCTGCCATGCATCATGGT
ATACCATTTTACGTTGCAGCTCCTCTGACTTCTGTTGATCTATCCCTTTCTTCTGGACAA
GAAATTGTGATAGAAGAAAGATCTCCAAAGGAACTGTTACATACACGAGGAGGACTAGGT
GAACAAGTTGCTGCCTCTGGTATTTCGGTTTGGAACCCTGCATTTGATGTCACCCCAGCT
AAGTTGATTAGTGGAATCATCACTGAAAAGGGTGTCATCACGAAGAATGGGACAGACACC
TTTGATATTGCTGGGTTTGTGCGGAAGACATCAGGAAATTTGTGA
>Soltu.DM.08G009230.1
ATGGTTGGTTTATCTCTGCCCTCAACCTTCACCGGAACTTGCTGGAGAAGAAGACGGAGA
ATGAACACTCTGTTACTTCCTCCGCCGTCGCAACTGCCTTATCAATTCCGTCGCCGACAT
CAAATTCTTGGCCAACACTCCTCAACTTCCCATCTATCTATCTCCAACCAATTCAATATA
GAAGAAGAAGAAGAGGATGAAGAATACCATATCGGTTCATACTCAAATCAACGCTACGAT
TTCACTCCTCTCCTTCAATTTCTTTCCACCACCGAACCCAATTCAGATAATTCTTCACCC
ACACAACTCCACCCCACCGAGTTGCGGCTCGCTGAGTCATATCGAGCTGTGCCCGCTCCA
CTCTGGCACTCTCTTCTCAAAGGTCTCTCCTCCACCCCATCCTCAATTTCCATAGCCTAT
GCACTCGTTATATGGCTTCAGAAGCACAACCTTTGTTTCTCTTACGAACTTCTCTACTCT
ATTCTTATTCACGCGCTCGGACGCTCCGAGAAATTGTACGAGGCTTTTTTGCTCTCTCAG
AGGCAAACACTCACCCCTTTAACCTACAATGCACTTATTGGAGCTTGTGCACGAAACGGT
GATCTCGAAAAAGCACTTAATTTGATGTGTAGAATGCGCAGAGACGGGTATCAATCTGAC
TATGTTAATTATAGTTTGATTATTCAGTCCCTTATTCGTAGTAATTCTATTGATTTGACC
ATGTTACACAAGTTCTGTTATGAAATTGAAGCTGATATGATTGAACTTGATGGCCAATTG
TTGAATGATATGATTGTGGGTTTCGCTAAAGCTGGTGATGTTGATAGAGCTTTAGGTTTC
ATGAGTATTGTTCAAGGTAATGGATTGAGCCCTAAAACAGCTACTGTTGTTAACTTGATA
TCCGAATTGGGTAATTCAGGCAGGACTGAGGAAGCTGAGGCTATATTTGAGGAGTTGAAA
GAAGGCGGGTTAAAGCCAAGGACGAGGGCGTTTAATGCCCTTTTAAAAGGGTATGTTAAA
ACTGGATCTTTGAAGGATGCTGAGTATATTGTGTCAGAGATGGAGAGTAGTGGGGTCGCA
CCAGATGAACATACATATAGCTTGCTTATTGATGCTTATGGAAATGCAGGTAGGTGGGAA
AGTGCGAGAATTGTGTTGAAAGAAATGGAAGCTAATAATGTTCAGCCAAATTCATTTGTG
TTTAGTAGGATCTTAGCTAGTTATCGTGATAGGGGAGAGTGGCAGAGATCATTTCAGGTG
CTTAAAGAAATGAAGAATAGTGGGGTCAATCCTGATAGGCAGTTCTATAACATAATGATT
GATACTTTTGGGAAGTACAATTGTTTGGATCATGCAATGTCTACATTTGAAAGGATGAAG
TTGGAGGAAATTGAACCTGATACTGTTACATGGAACACACTAATAGATTGCCATAGTAAG
CATGGCCACCACAATAAGGCGGAGGAGCTGTTTGAGACGATGCAGGAAAGTGGATGTTCT
CCCTGCACCACCACATACAATATAATGATTAATTCTTTTGGTGAGCTCGAGAAATGGGAG
GAGGTGAAGTGCCTGTTGAGTAAAATGCAGAGTCAGGGCCTACTTCCCAACGTTGTTACA
TATACCACTCTAATTAATATTTATGGACAGTCAGGAAGGTTCAATGATGCTATTGAGTGC
TTGGAGGTAATGAAGTCTGCAGGGTTGAAGCCATCCTCAACCATGTATAATGCCTTGATC
AATGCCTATGCACAGAGGGGATTGTCTGAACAAGCAGTAAATGCCTTTAGGATCATGAAG
GGTGATGGTCTAAAGCCCAGCCTGTTAGCTCTCAATTCACTAATTAATGCATTTGGTGAG
GATCGGAGAGATGCTGAAGCTTTTGCTGTATTGAAGTATTTGAAAGAAAATGATATGAAG
CCGGATGTTGTTACTTACACCACTCTCATGAAAACCTTGATACGTGTGGAGAAGTTTGAA
AGGGTTCCAGCTGTTTATGAAGAAATGTTGTTGTGTGGATGCATCCCAGATAGGAAAGCT
AGAGCGATGCTACGATCTGCTTTGAGATACATGAAGTCAACATTGAAATTGTAG
>Soltu.DM.08G009230.2
ATGGTTGGTTTATCTCTGCCCTCAACCTTCACCGGAACTTGCTGGAGAAGAAGACGGAGA
ATGAACACTCTGTTACTTCCTCCGCCGTCGCAACTGCCTTATCAATTCCGTCGCCGACAT
CAAATTCTTGGCCAACACTCCTCAACTTCCCATCTATCTATCTCCAACCAATTCAATATA
GAAGAAGAAGAAGAGGATGAAGAATACCATATCGGTTCATACTCAAATCAACGCTACGAT
TTCACTCCTCTCCTTCAATTTCTTTCCACCACCGAACCCAATTCAGATAATTCTTCACCC
ACACAACTCCACCCCACCGAGTTGCGGCTCGCTGAGTCATATCGAGCTGTGCCCGCTCCA
CTCTGGCACTCTCTTCTCAAAGGTCTCTCCTCCACCCCATCCTCAATTTCCATAGCCTAT
GCACTCGTTATATGGCTTCAGAAGCACAACCTTTGTTTCTCTTACGAACTTCTCTACTCT
ATTCTTATTCACGCGCTCGGACGCTCCGAGAAATTGTACGAGGCTTTTTTGCTCTCTCAG
AGGCAAACACTCACCCCTTTAACCTACAATGCACTTATTGGAGCTTGTGCACGAAACGGT
GATCTCGAAAAAGCACTTAATTTGATGTGTAGAATGCGCAGAGACGGGTATCAATCTGAC
TATGTTAATTATAGTTTGATTATTCAGTCCCTTATTCGTAGTAATTCTATTGATTTGACC
ATGTTACACAAGTTCTGTTATGAAATTGAAGCTGATATGATTGAACTTGATGGCCAATTG
TTGAATGATATGATTGTGGGTTTCGCTAAAGCTGGTGATGTTGATAGAGCTTTAGGTTTC
ATGAGTATTGTTCAAGGTAATGGATTGAGCCCTAAAACAGCTACTGTTGTTAACTTGATA
TCCGAATTGGGTAATTCAGGCAGGACTGAGGAAGCTGAGGCTATATTTGAGGAGTTGAAA
GAAGGCGGGTTAAAGCCAAGGACGAGGGCGTTTAATGCCCTTTTAAAAGGGTATGTTAAA
ACTGGATCTTTGAAGGATGCTGAGTATATTGTGTCAGAGATGGAGAGTAGTGGGGTCGCA
CCAGATGAACATACATATAGCTTGCTTATTGATGCTTATGGAAATGCAGGTAGGTGGGAA
AGTGCGAGAATTGTGTTGAAAGAAATGGAAGCTAATAATGTTCAGCCAAATTCATTTGTG
TTTAGTAGGATCTTAGCTAGTTATCGTGATAGGGGAGAGTGGCAGAGATCATTTCAGGTG
CTTAAAGAAATGAAGAATAGTGGGGTCAATCCTGATAGGCAGTTCTATAACATAATGATT
GATACTTTTGGGAAGTACAATTGTTTGGATCATGCAATGTCTACATTTGAAAGGATGAAG
TTGGAGGAAATTGAACCTGATACTGTTACATGGAACACACTAATAGATTGCCATAGTAAG
CATGGCCACCACAATAAGGCGGAGGAGCTGTTTGAGACGATGCAGGAAAGTGGATGTTCT
CCCTGCACCACCACATACAATATAATGATTAATTCTTTTGGTGAGCTCGAGAAATGGGAG
GAGGTGAAGTGCCTGTTGAGTAAAATGCAGAGTCAGGGCCTACTTCCCAACGTTGTTACA
TATACCACTCTAATTAATATTTATGGACAGTCAGGAAGGTTCAATGATGCTATTGAGTGC
TTGGAGGTAATGAAGTCTGCAGGGTTGAAGCCATCCTCAACCATGTATAATGCCTTGATC
AATGCCTATGCACAGAGGGGATTGTCTGAACAAGCAGTAAATGCCTTTAGGATCATGAAG
GGTGATGGTCTAAAGCCCAGCCTGTTAGCTCTCAATTCACTAATTAATGCATTTGGTGAG
GATCGGAGAGATGCTGAAGCTTTTGCTGTATTGAAGTATTTGAAAGAAAATGATATGAAG
CCGGATGTTGTTACTTACACCACTCTCATGAAAACCTTGATACGTGTGGAGAAGTTTGAA
AGGGTTCCAGCTGTTTATGAAGAAATGTTGTTGTGTGGATGCATCCCAGATAGGAAAGCT
AGAGCGATGCTACGATCTGCTTTGAGATACATGAAGTCAACATTGAAATTGTAG
>Soltu.DM.08G009230.3
ATGGTTGGTTTATCTCTGCCCTCAACCTTCACCGGAACTTGCTGGAGAAGAAGACGGAGA
ATGAACACTCTGTTACTTCCTCCGCCGTCGCAACTGCCTTATCAATTCCGTCGCCGACAT
CAAATTCTTGGCCAACACTCCTCAACTTCCCATCTATCTATCTCCAACCAATTCAATATA
GAAGAAGAAGAAGAGGATGAAGAATACCATATCGGTTCATACTCAAATCAACGCTACGAT
TTCACTCCTCTCCTTCAATTTCTTTCCACCACCGAACCCAATTCAGATAATTCTTCACCC
ACACAACTCCACCCCACCGAGTTGCGGCTCGCTGAGTCATATCGAGCTGTGCCCGCTCCA
CTCTGGCACTCTCTTCTCAAAGGTCTCTCCTCCACCCCATCCTCAATTTCCATAGCCTAT
GCACTCGTTATATGGCTTCAGAAGCACAACCTTTGTTTCTCTTACGAACTTCTCTACTCT
ATTCTTATTCACGCGCTCGGACGCTCCGAGAAATTGTACGAGGCTTTTTTGCTCTCTCAG
AGGCAAACACTCACCCCTTTAACCTACAATGCACTTATTGGAGCTTGTGCACGAAACGGT
GATCTCGAAAAAGCACTTAATTTGATGTGTAGAATGCGCAGAGACGGGTATCAATCTGAC
TATGTTAATTATAGTTTGATTATTCAGTCCCTTATTCGTAGTAATTCTATTGATTTGACC
ATGTTACACAAGTTCTGTTATGAAATTGAAGCTGATATGATTGAACTTGATGGCCAATTG
TTGAATGATATGATTGTGGGTTTCGCTAAAGCTGGTGATGTTGATAGAGCTTTAGGTTTC
ATGAGTATTGTTCAAGGTAATGGATTGAGCCCTAAAACAGCTACTGTTGTTAACTTGATA
TCCGAATTGGGTAATTCAGGCAGGACTGAGGAAGCTGAGGCTATATTTGAGGAGTTGAAA
GAAGGCGGGTTAAAGCCAAGGACGAGGGCGTTTAATGCCCTTTTAAAAGGGTATGTTAAA
ACTGGATCTTTGAAGGATGCTGAGTATATTGTGTCAGAGATGGAGAGTAGTGGGGTCGCA
CCAGATGAACATACATATAGCTTGCTTATTGATGCTTATGGAAATGCAGGTAGGTGGGAA
AGTGCGAGAATTGTGTTGAAAGAAATGGAAGCTAATAATGTTCAGCCAAATTCATTTGTG
TTTAGTAGGATCTTAGCTAGTTATCGTGATAGGGGAGAGTGGCAGAGATCATTTCAGGTG
CTTAAAGAAATGAAGAATAGTGGGGTCAATCCTGATAGGCAGTTCTATAACATAATGATT
GATACTTTTGGGAAGTACAATTGTTTGGATCATGCAATGTCTACATTTGAAAGGATGAAG
TTGGAGGAAATTGAACCTGATACTGTTACATGGAACACACTAATAGATTGCCATAGTAAG
CATGGCCACCACAATAAGGCGGAGGAGCTGTTTGAGACGATGCAGGAAAGTGGATGTTCT
CCCTGCACCACCACATACAATATAATGATTAATTCTTTTGGTGAGCTCGAGAAATGGGAG
GAGGTGAAGTGCCTGTTGAGTAAAATGCAGAGTCAGGGCCTACTTCCCAACGTTGTTACA
TATACCACTCTAATTAATATTTATGGACAGTCAGGAAGGTTCAATGATGCTATTGAGTGC
TTGGAGGTAATGAAGTCTGCAGGGTTGAAGCCATCCTCAACCATGTATAATGCCTTGATC
AATGCCTATGCACAGAGGGATATGAAGCCGGATGTTGTTACTTACACCACTCTCATGAAA
ACCTTGATACGTGTGGAGAAGTTTGAAAGGGTTCCAGCTGTTTATGAAGAAATGTTGTTG
TGTGGATGCATCCCAGATAGGAAAGCTAGAGCGATGCTACGATCTGCTTTGAGATACATG
AAGTCAACATTGAAATTGTAG
>Soltu.DM.08G009280.1
ATGGCTGAAATGAGTGTTACCAATACCACCGCTTCACTTCAATCCTTTCCTAAATCACCT
CTCTGCTCTCTCTCAACCACAAAATTTAACTCTCCTTACCATCCTTCAGCTATTGTATCT
CCCATTCCCAGGTTTTGCTTAATATCTAAATACAATTCGTTTTGTTTCTCTGCTGCTGTT
GTGAAGGCTGCTTCTTCTTCACACGCAAATACAAAGGACCCAATGCTTCCTCCTTACAAT
GTCTTAATTACAGGTGGTTCCAAAGGAATAGGCTATGCATTAGCTAAAGAATTTCTCAAG
GCAGGTGATAATGTCCTCATTTGCTCCAGATCAGGTGATTTCATATCATAA
>Soltu.DM.08G009290.1
ATGGGATCGAATGCGTATAGCTTCAAACCCCTGGCAGAAGCTTCTGATGAAGATTTAATT
CAAGTTGTCACTACAAATACTCTTGGTTTGATGATATGTTGTCGTGAGGCTATAAACTTG
ATGCAGAATCAGCCTCGAGGAGGTCATATTTTTAATATTGATGGGGCTGGCTCAGATGGA
AGACCAACCCCCAGGTTTGCAGCATACGGAGCAACTAAGCGCAGTGTGGTGCACTTAACA
AAATCATTGCAGGCATGTACTCTGGCAGAATTGGAAATGCAAGATGTTAAAAATGTTTTA
GTGCATAATCTGTCGGTCCCTTTCACTACCATGGAAAGCATCCCTATTAATCAGACAAAA
GTTATATTGCAAAAATGTATATATTTCCTATATGAGCCTGGAATGGTCACAACTGATCTT
TTAATGTCCGGTGCCAACACGAAGCAGGCCAAGTTCTTCATTAACGTTTTGGCAGAGCCA
GCAGATGTGGTTGCAGAGTATTTAGTCCCAAATATAAGATCAATACCGACCAATGGATCA
ACGAAGGCTACTTACATACGTTTCCTCACAGGATTAAAAGCCTATTCCCAAATATTTTCA
AGGATTGCGTTTGGTGCTAGACGGAATCGGTATGTTCTTGAAGATTGA
>Soltu.DM.08G009310.1
ATGGAAAACGCATTATGCCAAGCATTATCACTAAATACATCATCGAAATCTGTTCATGAA
TCGGACGTTTCAAGAATCATCAAAGAATTCGTTCGTAATCCAGTGTTGAAGGAAGGAAGT
ATTTTCAAAAGACTTGATGTTATCAATGGTTGCTTTGGCAAGGACACGGTTGAAGAAATA
TTATTTGCACTTGAAAAGGAAAACACTGCAATGAATGATAAGTGGATCACCAATGCAATC
AAGTCTATGAAGTTGGCATCACCAACAAGCCTTAAGATTACTCTCAGATCTATTAGAGAA
GGACGCAAGCAAACACTTAGACAATGTTTGATTCGTGAATTTAACATCAGTAGTCACATT
GTACTAAGATCATTCAATTACAACGATTTCTATGAGGGTGGTAAAGCAATCTTTTTTACA
AAGGACAAAACGTTTAAGTGGGAACCATCAAAGTTGGTGCAAGTACACGATGCAATAGTA
ATGCAGTTTTCTGAAGTGGTCCATGACGATCGTTGGGGTTACTTGGAACTTCCAGAAAGA
GAACAATTGAAAAGGTCTAAACTTTAA
>Soltu.DM.08G009320.1
ATGCATGCATGCATGAAGGTTTTCCTTATCAATGGAGCTGTAATGGGAGGAGGTGCTGGT
CTTTCCATGAATGCTAAATTCCGTATTGTAACTGAAAATACGGTATTTGCCATGCCAGAA
GCCTCATTTGGACATTATCCGGATGTTGGGGCATCTTATTTTCTTTCAAGATTACCTGGC
CATTTTGGAGAATACTTAGGATTAACAGGGGCAAAAATAAATGGCTCTGAAATGATTGCA
TCTGGCCTTGCAACTCATTTTGTTTATTCAAAGGTTGCTTCCTGTTTTGTTTTGAGTTTG
CTGATGAAAGAGGATATTCTTATCCTTATCCTTCCTTTCATCTACATGTTTCCATTCATC
TGCTTCTGCTTTCAGAGTGTCTTCCATGGTCTTGATCATTGA
>Soltu.DM.08G009350.1
ATGAAAATACGGAGGATAGTGAGACCTCACCAAGAGAGGTTCTCAGCTGCTCAACGACCC
CGCAACAGAACTCTTTCATCTGTTCATGATGCCATATTGGAGGACTTGGTTGTTCCAGCA
GAGATTGTTGGAAGCGTACGAAGTATCACGTTGGCCCCAAGGAACGAAACAACACCAAGT
ATTAGTTGGAGACCTTTTCAACAGTTAATAGAAAGCCTTCAGACAAAGATGTTGTGTTTG
AGTACCCCGTCCCGTCTCTGA
>Soltu.DM.08G009370.1
ATGAAGAAAATCAAGATCGATTTTGTCTTGGGAAACGCGCTTATAGATATGTACTTCAAA
TGTGGGAATGTAGAAGCTGCTATACAAGTCTTCCATGGCTTAAATGATAGAAACATCTTC
TGCTGGAATTCTATCATCATTGGACTAGGAGTGCACGGTTGGGAGAAAGCGGACCAACGC
TCACCGGAGACCACTGGTGGTGCACGCCACCACTGTTTTGCAGTAGAGTGTGAGAGAGAG
GCGACATTGGCTAGTGGAGAGGAGAACGAGGCGAAAGGTGAAATTGCTCCTGTCTCCTTC
ATCCTCAGGAGAAAGGTATACCATCCAGTGTATGTGAAGCTCGAAGAAAGACATAGACAT
CTGGTAAGTGTTCTATTTCCCCTTCTTCTTCTTCTTTCCACTGTCATAAACAGATTTTCT
GTTGAAGTTAGAAAAGGAAAATGTTTCTTCAACCATCTCATATCAGTGTTGGAAGAAAAG
GAAATGACATGA
>Soltu.DM.08G009390.1
ATGGCTTGTGTAAGCAGTGGCATGTGGGGAGTGGGCATCATGAGTAATGCTAATTCGAAT
AGATATTCATATTTGAATAATAATAAATTTAGCAACAACCCAAGTTTAGTACTAAGTAGT
AGCAAGGGTAAAAGAAGTATAGTCGCATCAGGTGAAAAGGAATCAAGCAGCATGGCCACT
GAGATTGCCGGAGTGAAGGTCATTAACAACCCTCCCCAATCTAAACTCGCTGACCTCGGC
GTCACCTCTTGGCCCAAGGTAGGACTGCACGAAGATGATCCAATTCCTGGCTTGCTATGT
GTAGTAGAGCATTGCACTCCACACAGCAAACACAAGATCCTTCTGAAACAGTCTCCAATG
TCTACTCCTTATCCATTGGCTTTTACTGCTGTCAATTCCAAATATTGCCACCTTCATGTG
TTTGCTGGTGTATGGATTGATTGTGTTATGGCTTGCTGCAACTTCCTATGTTCTATTACT
GAGAAGAAGCTTCTGGAGTTATCTCCCAGTTTCACCCACTTTGCTTTACTCCTCTCCAGT
AGAAAGTTTTCTGCTAGGTCAGGGGGTTCTCCTGAACTTCTGATATTGCACCTTCTCCTA
TTGTTGCAATAG
>Soltu.DM.08G009400.1
ATGGGAAAGAGAGTTCGCACTCCCTCTCAGAAGGTACTCATGTCCCAAGAGAATGCATCT
AAGGCTGGCAATCAACAGAAGAAGAAAGGAAATCAAACAATCAAGGAGGTTGTGAAGGTC
ACTAATGGAACAGTTACTCCAGGGACTGCTGCACATCGTACAGGAATAGTGGTCTATCAT
ATCCAGGTTGAACTGACTCAGGAAGAAGGGGCGGCTCACAAGCAAGCTGAAATTGCTTCA
ACACAATTAAGGAGCACACTGAGGAGGAAGGATAACCAGGTGACGGAGGAAACCCTAGAG
AAAACCATTGGAACAATAACTGTAGATAAGGTTGAAAGCTCACATGAGTTGAACAAGAAT
AGGTCCATATGGGACAATTTTGATATTACCAAAATCTCTAATGCAGGGTTTAAGCTTGAA
TTGGTAGAACCTGAAATGCATGTTGTGGTGTCACCTGCTCAAGTTTCAGAGATGATCAAG
GATAATTCTGTGGAGATGAACCAGGAGAGACTGAAAACAGTGGGGAATAAGGAGGGTACA
GGCAAGACGGAGGTACTCACCAGCATTCTGGAAGGCAGGAGGAGGATGGTTAACTCCTTT
GCATACCAACAAGCAACAGGCTAG
>Soltu.DM.08G009410.1
ATGCCGGAGCTGGGAGAGTGCAGCAAAGAACATGGAGGTCTGCCACTATCTTTGGACCAA
CAGGTAATAGAGCTATCTAAAGGACAATTTTTTTTTAAAAAGTCAGATGGTGTGCAGATG
AGGCACATGGGGCTCCCAGAGACAGCTGGAGTCTTTTTAAATGAGACCCCACACTCATGT
GCTAAGGAAGTGGAGACCCAAGTCTATTTTAGAAAAAAATTGGGCTGGGGCAATAGTAAA
AAAAAGATTGGGCCTGATAGAGCAAATATCATTTTAAATGACTTATTAGGCCCAAGTGAG
GTTGCCTTTATTGATTCTTTATGCTTTGAAATAAAGGACCATGCTCCAGTTCTTAAGAGC
ACTCTTCTACAACATGATACTACAGCAAATGAAGGGCATGCAGAACATGGGAACTCAATT
GTAAACTCAGGAGATGCTTTGAATCCCCTCAAAACGATGGCGATGGAGGTTAGCAGTGAC
AAAGCAAATTTAATTTTGGAAATTCAGAAGGATCCAAAATACCACATCAAGCATGCAGAC
TGA
>Soltu.DM.08G009420.1
ATGGAGCTTCAGTTTGCAGGCGCATCGTATTTGATGAAAGAAGGTATAAAACCCCGAGGT
TTGATTATCAAATCATCAAGTAGTACTTCACAAGGGCTGCAGAAATGTTCAAAGAAAAAC
CTTTCTCGTATACTTAGAACAGAAGCCGCCATTAGAGGTATCCAGAGGAAAGCCAACTCA
GAAAAATACACTAATCTTTGGCCCAAGGCCGTTTTGGAGGCTCTCGATGATGCTATTAGG
GACAATCGCTGGGACTCTGCTCTTAAGATTTTCGACCTTCTTCGCAAGCAACATTGGTAT
GAGCCAAGATGCCATACATATGCTAAGCTTTTGGTAATGCTCGGCAAGTGCAAGCAGCCA
AGTAAAGCTAACTTGCTTTTTGAGATTATGCTAGTGGATGGGCTTCAACCAACAGTAGAT
GTTTATACTGCACTTGTAAATGCATATGGTCTTAGTGGCCTCCTTGATGAGGCGCTGCGA
ACTATTGATGATATGAAATCAGTTAGTAATTGCAAGCCTGATGTGTATACTTACTCGATC
CTAATTAAATGCTGCACTAAAGTTCGTCGTTTTGATATGATTGAATACATTTTGGCTGAG
ATGGTGTATTTGGGAATTGAATGTAGTTCCGTGACATACAATACCATAATTGATGGCTAT
GGTAAAGCTAAGCTGTTTGAGCAGATGGAAAGCTCCTTGACCGATATGATAGAAAATGAG
ACTGCCTTTCCAGATGTTTTCACCTTGAATTCAGTAATTGGGTCCTATGGCAGCTGTGGG
AAGCTTGAGAAAATGGAGAAGTGGTTTGAAGAATTTCAGGTAATGGGAATAAAGCCAGAT
GTTATGACATTTAACATTCTTATCAAGTCATATGGAAGAGCTGGCATGTACCAGAAAATG
GAGTCTGTACTTGATTTTATTAGGAATCGGTTCTATTCTCCAACAGTTGTGACTTACAAT
ATCATCATTGAGACATTGGGGAAAGCTTGCCTCATTAAGAACATGGAACAGTTTTTCCTA
CAGATGAAGCATGAAGGGGTGAAGCCAAGTTCATTCACTTATTGCTCTCTTGTAAGTGCT
TATAGTAGAGCTGGACTTATGGAAAATGTTGATTCAATCATGAGGCAAGTTGAGAATTCA
GATGTAGTTCTAGATACTCCTTTTTTCAATTGCATCATCAGTGCTTATGGTCAAGCTGGT
GATATAGAGAGGATGGTGGCATTATTCTTGGAAATGAAGGTCAGAAAATGTAAACCAGAC
TACATCACATTTTCTACCATGATTCAGGCGTACAATTCACAAGGGATGACTGAAGCTGCA
ATGGACTTGAAGACAAAAATAATTACTTCTTGTGAATCAAACGAATTGATCAGCAGCTAG
>Soltu.DM.08G009420.2
ATGGAGCTTCAGTTTGCAGGCGCATCGTATTTGATGAAAGAAGGTATAAAACCCCGAGGT
TTGATTATCAAATCATCAAGTAGTACTTCACAAGGGCTGCAGAAATGTTCAAAGAAAAAC
CTTTCTCGTATACTTAGAACAGAAGCCGCCATTAGAGGTATCCAGAGGAAAGCCAACTCA
GAAAAATACACTAATCTTTGGCCCAAGGCCGTTTTGGAGGCTCTCGATGATGCTATTAGG
GACAATCGCTGGGACTCTGCTCTTAAGATTTTCGACCTTCTTCGCAAGCAACATTGGTAT
GAGCCAAGATGCCATACATATGCTAAGCTTTTGGTAATGCTCGGCAAGTGCAAGCAGCCA
AGTAAAGCTAACTTGCTTTTTGAGATTATGCTAGTGGATGGGCTTCAACCAACAGTAGAT
GTTTATACTGCACTTGTAAATGCATATGGTCTTAGTGGCCTCCTTGATGAGGCGCTGCGA
ACTATTGATGATATGAAATCAGTTAGTAATTGCAAGCCTGATGTGTATACTTACTCGATC
CTAATTAAATGCTGCACTAAAGTTCGTCGTTTTGATATGATTGAATACATTTTGGCTGAG
ATGGTGTATTTGGGAATTGAATGTAGTTCCGTGACATACAATACCATAATTGATGGCTAT
GGTAAAGCTAAGCTGTTTGAGCAGATGGAAAGCTCCTTGACCGATATGATAGAAAATGAG
ACTGCCTTTCCAGATGTTTTCACCTTGAATTCAGTAATTGGGTCCTATGGCAGCTGTGGG
AAGCTTGAGAAAATGGAGAAGTGGTTTGAAGAATTTCAGGTAATGGGAATAAAGCCAGAT
GTTATGACATTTAACATTCTTATCAAGTCATATGGAAGAGCTGGCATGTACCAGAAAATG
GAGTCTGTACTTGATTTTATTAGGAATCGGTTCTATTCTCCAACAGTTGTGACTTACAAT
ATCATCATTGAGACATTGGGGAAAGCTTGCCTCATTAAGAACATGGAACAGTTTTTCCTA
CAGATGAAGCATGAAGGGGTGAAGCCAAGTTCATTCACTTATTGCTCTCTTGTAAGTGCT
TATAGTAGAGCTGGACTTATGGAAAATGTTGATTCAATCATGAGGCAAGTTGAGAATTCA
GATGTAGTTCTAGATACTCCTTTTTTCAATTGCATCATCAGTGCTTATGGTCAAGCTGGT
GATATAGAGAGGATGGTGGCATTATTCTTGGAAATGAAGGTCAGAAAATGTAAACCAGAC
TACATCACATTTTCTACCATGATTCAGGCGTACAATTCACAAGGGATGACTGAAGCTGCA
ATGGACTTGAAGACAAAAATAATTACTTCTTGTGAATCAAACGAATTGATCAGCAGCTAG
>Soltu.DM.08G009420.3
ATGGAGCTTCAGTTTGCAGGCGCATCGTATTTGATGAAAGAAGGTATAAAACCCCGAGGT
TTGATTATCAAATCATCAAGTAGTACTTCACAAGGGCTGCAGAAATGTTCAAAGAAAAAC
CTTTCTCGTATACTTAGAACAGAAGCCGCCATTAGAGGTATCCAGAGGAAAGCCAACTCA
GAAAAATACACTAATCTTTGGCCCAAGGCCGTTTTGGAGGCTCTCGATGATGCTATTAGG
GACAATCGCTGGGACTCTGCTCTTAAGATTTTCGACCTTCTTCGCAAGCAACATTGGTAT
GAGCCAAGATGCCATACATATGCTAAGCTTTTGGTAATGCTCGGCAAGTGCAAGCAGCCA
AGTAAAGCTAACTTGCTTTTTGAGATTATGCTAGTGGATGGGCTTCAACCAACAGTAGAT
GTTTATACTGCACTTGTAAATGCATATGGTCTTAGTGGCCTCCTTGATGAGGCGCTGCGA
ACTATTGATGATATGAAATCAGTTAGTAATTGCAAGCCTGATGTGTATACTTACTCGATC
CTAATTAAATGCTGCACTAAAGTTCGTCGTTTTGATATGATTGAATACATTTTGGCTGAG
ATGGTGTATTTGGGAATTGAATGTAGTTCCGTGACATACAATACCATAATTGATGGCTAT
GGTAAAGCTAAGCTGTTTGAGCAGATGGAAAGCTCCTTGACCGATATGATAGAAAATGAG
ACTGCCTTTCCAGATGTTTTCACCTTGAATTCAGTAATTGGGTCCTATGGCAGCTGTGGG
AAGCTTGAGAAAATGGAGAAGTGGTTTGAAGAATTTCAGGTAATGGGAATAAAGCCAGAT
GTTATGACATTTAACATTCTTATCAAGTCATATGGAAGAGCTGGCATGTACCAGAAAATG
GAGTCTGTACTTGATTTTATTAGGAATCGGTTCTATTCTCCAACAGTTGTGACTTACAAT
ATCATCATTGAGACATTGGGGAAAGCTTGCCTCATTAAGAACATGGAACAGTTTTTCCTA
CAGATGAAGCATGAAGGGGTGAAGCCAAGTTCATTCACTTATTGCTCTCTTGTAAGTGCT
TATAGTAGAGCTGGACTTATGGAAAATGTTGATTCAATCATGAGGCAAGTTGAGAATTCA
GATGTAGTTCTAGATACTCCTTTTTTCAATTGCATCATCAGTGCTTATGGTCAAGCTGGT
GATATAGAGAGGATGGTGGCATTATTCTTGGAAATGAAGGTCAGAAAATGTAAACCAGAC
TACATCACATTTTCTACCATGATTCAGGCGTACAATTCACAAGGGATGACTGAAGCTGCA
ATGGACTTGAAGACAAAAATAATTACTTCTTGTGAATCAAACGAATTGATCAGCAGCTAG
>Soltu.DM.08G009420.4
ATGGAGCTTCAGTTTGCAGGCGCATCGTATTTGATGAAAGAAGGTATAAAACCCCGAGGT
TTGATTATCAAATCATCAAGTAGTACTTCACAAGGGCTGCAGAAATGTTCAAAGAAAAAC
CTTTCTCGTATACTTAGAACAGAAGCCGCCATTAGAGGTATCCAGAGGAAAGCCAACTCA
GAAAAATACACTAATCTTTGGCCCAAGGCCGTTTTGGAGGCTCTCGATGATGCTATTAGG
GACAATCGCTGGGACTCTGCTCTTAAGATTTTCGACCTTCTTCGCAAGCAACATTGGTAT
GAGCCAAGATGCCATACATATGCTAAGCTTTTGGTAATGCTCGGCAAGTGCAAGCAGCCA
AGTAAAGCTAACTTGCTTTTTGAGATTATGCTAGTGGATGGGCTTCAACCAACAGTAGAT
GTTTATACTGCACTTGTAAATGCATATGGTCTTAGTGGCCTCCTTGATGAGGCGCTGCGA
ACTATTGATGATATGAAATCAGTTAGTAATTGCAAGCCTGATGTGTATACTTACTCGATC
CTAATTAAATGCTGCACTAAAGTTCGTCGTTTTGATATGATTGAATACATTTTGGCTGAG
ATGGTGTATTTGGGAATTGAATGTAGTTCCGTGACATACAATACCATAATTGATGGCTAT
GGTAAAGCTAAGCTGTTTGAGCAGATGGAAAGCTCCTTGACCGATATGATAGAAAATGAG
ACTGCCTTTCCAGATGTTTTCACCTTGAATTCAGTAATTGGGTCCTATGGCAGCTGTGGG
AAGCTTGAGAAAATGGAGAAGTGGTTTGAAGAATTTCAGGTAATGGGAATAAAGCCAGAT
GTTATGACATTTAACATTCTTATCAAGTCATATGGAAGAGCTGGCATGTACCAGAAAATG
GAGTCTGTACTTGATTTTATTAGGAATCGGTTCTATTCTCCAACAGTTGTGACTTACAAT
ATCATCATTGAGACATTGGGGAAAGCTTGCCTCATTAAGAACATGGAACAGTTTTTCCTA
CAGATGAAGCATGAAGGGGTGAAGCCAAGTTCATTCACTTATTGCTCTCTTGTAAGTGCT
TATAGTAGAGCTGGACTTATGGAAAATGTTGATTCAATCATGAGGCAAGTTGAGAATTCA
GATGTAGTTCTAGATACTCCTTTTTTCAATTGCATCATCAGTGCTTATGGTCAAGCTGGT
GATATAGAGAGGATGGTGGCATTATTCTTGGAAATGAAGGTCAGAAAATGTAAACCAGAC
TACATCACATTTTCTACCATGATTCAGGCGTACAATTCACAAGGGATGACTGAAGCTGCA
ATGGACTTGAAGACAAAAATAATTACTTCTTGTGAATCAAACGAATTGATCAGCAGCTAG
>Soltu.DM.08G009420.5
ATGGAGCTTCAGTTTGCAGGCGCATCGTATTTGATGAAAGAAGGTATAAAACCCCGAGGT
TTGATTATCAAATCATCAAGTAGTACTTCACAAGGGCTGCAGAAATGTTCAAAGAAAAAC
CTTTCTCGTATACTTAGAACAGAAGCCGCCATTAGAGGTATCCAGAGGAAAGCCAACTCA
GAAAAATACACTAATCTTTGGCCCAAGGCCGTTTTGGAGGCTCTCGATGATGCTATTAGG
GACAATCGCTGGGACTCTGCTCTTAAGATTTTCGACCTTCTTCGCAAGCAACATTGGTAT
GAGCCAAGATGCCATACATATGCTAAGCTTTTGGTAATGCTCGGCAAGTGCAAGCAGCCA
AGTAAAGCTAACTTGCTTTTTGAGATTATGCTAGTGGATGGGCTTCAACCAACAGTAGAT
GTTTATACTGCACTTGTAAATGCATATGGTCTTAGTGGCCTCCTTGATGAGGCGCTGCGA
ACTATTGATGATATGAAATCAGTTAGTAATTGCAAGCCTGATGTGTATACTTACTCGATC
CTAATTAAATGCTGCACTAAAGTTCGTCGTTTTGATATGATTGAATACATTTTGGCTGAG
ATGGTGTATTTGGGAATTGAATGTAGTTCCGTGACATACAATACCATAATTGATGGCTAT
GGTAAAGCTAAGCTGTTTGAGCAGATGGAAAGCTCCTTGACCGATATGATAGAAAATGAG
ACTGCCTTTCCAGATGTTTTCACCTTGAATTCAGTAATTGGGTCCTATGGCAGCTGTGGG
AAGCTTGAGAAAATGGAGAAGTGGTTTGAAGAATTTCAGGTAATGGGAATAAAGCCAGAT
GTTATGACATTTAACATTCTTATCAAGTCATATGGAAGAGCTGGCATGTACCAGAAAATG
GAGTCTGTACTTGATTTTATTAGGAATCGGTTCTATTCTCCAACAGTTGTGACTTACAAT
ATCATCATTGAGACATTGGGGAAAGCTTGCCTCATTAAGAACATGGAACAGTTTTTCCTA
CAGATGAAGCATGAAGGGGTGAAGCCAAGTTCATTCACTTATTGCTCTCTTGTAAGTGCT
TATAGTAGAGCTGGACTTATGGAAAATGTTGATTCAATCATGAGGCAAGTTGAGAATTCA
GATGTAGTTCTAGATACTCCTTTTTTCAATTGCATCATCAGTGCTTATGGTCAAGCTGGT
GATATAGAGAGGATGGTGGCATTATTCTTGGAAATGAAGGTCAGAAAATGTAAACCAGAC
TACATCACATTTTCTACCATGATTCAGGCGTACAATTCACAAGGGATGACTGAAGCTGCA
ATGGACTTGAAGACAAAAATAATTACTTCTTGTGGTACTTGTACTATTTAG
>Soltu.DM.08G009420.6
ATGGAGCTTCAGTTTGCAGGCGCATCGTATTTGATGAAAGAAGGTATAAAACCCCGAGGT
TTGATTATCAAATCATCAAGTAGTACTTCACAAGGGCTGCAGAAATGTTCAAAGAAAAAC
CTTTCTCGTATACTTAGAACAGAAGCCGCCATTAGAGGTATCCAGAGGAAAGCCAACTCA
GAAAAATACACTAATCTTTGGCCCAAGGCCGTTTTGGAGGCTCTCGATGATGCTATTAGG
GACAATCGCTGGGACTCTGCTCTTAAGATTTTCGACCTTCTTCGCAAGCAACATTGGTAT
GAGCCAAGATGCCATACATATGCTAAGCTTTTGGTAATGCTCGGCAAGTGCAAGCAGCCA
AGTAAAGCTAACTTGCTTTTTGAGATTATGCTAGTGGATGGGCTTCAACCAACAGTAGAT
GTTTATACTGCACTTGTAAATGCATATGGTCTTAGTGGCCTCCTTGATGAGGCGCTGCGA
ACTATTGATGATATGAAATCAGTTAGTAATTGCAAGCCTGATGTGTATACTTACTCGATC
CTAATTAAATGCTGCACTAAAGTTCGTCGTTTTGATATGATTGAATACATTTTGGCTGAG
ATGGTGTATTTGGGAATTGAATGTAGTTCCGTGACATACAATACCATAATTGATGGCTAT
GGTAAAGCTAAGCTGTTTGAGCAGATGGAAAGCTCCTTGACCGATATGATAGAAAATGAG
ACTGCCTTTCCAGATGTTTTCACCTTGAATTCAGTAATTGGGTCCTATGGCAGCTGTGGG
AAGCTTGAGAAAATGGAGAAGTGGTTTGAAGAATTTCAGGTAATGGGAATAAAGCCAGAT
GTTATGACATTTAACATTCTTATCAAGTCATATGGAAGAGCTGGCATGTACCAGAAAATG
GAGTCTGTACTTGATTTTATTAGGAATCGGTTCTATTCTCCAACAGTTGTGACTTACAAT
ATCATCATTGAGACATTGGGGAAAGCTTGCCTCATTAAGAACATGGAACAGTTTTTCCTA
CAGATGAAGCATGAAGGGGTGAAGCCAAGTTCATTCACTTATTGCTCTCTTGTAAGTGCT
TATAGTAGAGCTGGACTTATGGAAAATGTTGATTCAATCATGAGGCAAGTTGAGAATTCA
GATGTAGTTCTAGATACTCCTTTTTTCAATTGCATCATCAGTGCTTATGGTCAAGCTGGT
GATATAGAGAGGATGGTGGCATTATTCTTGGAAATGAAGGTCAGAAAATGTAAACCAGAC
TACATCACATTTTCTACCATGATTCAGGCGTACAATTCACAAGGGATGACTGAAGCTGCA
ATGGACTTGAAGACAAAAATAATTACTTCTTGTGAATCAAACGAATTGATCAGCAGCTAG
>Soltu.DM.08G009430.1
ATGAACTACTCTATGGGAATGGAGGCTAAGCACCGAGTGGATATGGCAAGTAGACCACCT
CTCTACGGTGTGGGGCTATATGACACCGGATTCCATGGTTTGCTCTCAAGGTCTATGTCG
GTTAATGCTTATTCCCATCATGTGGAAATGATGAATGGTAAGTTCACTTTTGGTGGCCTT
AATGTGGTATCTAGTGTGGATGGTGGTATGGGATGCTATTCATACATTGCACAAGGTATG
GCTTGGGGTTACTTGAGGTGA
>Soltu.DM.08G009450.1
ATGGTAGATCCTCTTCTTGAGAATCCAACCCTCTTTGCTGGATATCGAACTGCTGAATGG
GGATTGTGTGTTGCAGGAATGAAGGAAGACGATAAGCTAGATCATGCTGAGTTACTGATA
GAATATTTGAGTGAACCGATTAAAGGAACTTGGGGTGAGAATACCACTTTATGCGGAAGG
ATACTCAGCAGGCAGTATTTGCAAAATGACTTGTTACTCAAGTTCTGTTCTAACCTGAAA
TATGGAGCCAGGTATGGTGAATCACCAGGGTCTGTTAATGATGAAAATGCCCTAGCTTCT
GTAAGAGTCAATCAGCCTGATTCTGTTTCTGTTTCTAAGATTCAAAGAGAAGTTCCTAGA
AATGACAAGTGCTCTGACTGTGGTGCTTCAGAACCTGATTGGGCTTCTTTACATCTTGGC
ATCCTAATTTGTATAGAATGCTCGAGCATTCATCGGAACCTTGGTGTTCATATCTCAAAG
GTAAGGTCCATATTATTAGATGTCAGGGTTTGGGAGCCTACCATCTTGGATCTATTCCGC
ACATTGGGTAATTCTTATTGTAACTCGGTGTGGGAGGAGTTGCTTCAACTTCCAAGTGAC
GGATTAACAAATGTTGATGCTATTCAATCTGCTTCCAAGCCAAGCCCCAAAGATGCCTTT
CATGAAAAAGAGAAGTATATTTTGGCAAAGAGTGTTCTTCAAAATCACAAGAAAACTTGG
CCCTTTTTGGCTGGAATTCAAGAGCACACACTTCTTGTTGGGAATGATCGAGAGGAGGCA
